# Supplementary material
Source: PubMed Central journal article supplement (PMC5869477)
Supplement: JB.00743-17_zjb999094695s1.pdf [file JB.00743-17_zjb999094695s1.pdf]

**Table S1. Primers used in this study**

| <b>Primer</b>                                         | <b>Oligo sequence (5' to 3')<sup>a</sup></b> | <b>Purpose<sup>b</sup></b>                      |
|-------------------------------------------------------|----------------------------------------------|-------------------------------------------------|
| <b>RT-PCR</b>                                         |                                              |                                                 |
| KM1309                                                | gatgaccgagcttagcgagc                         | <i>sigA</i> internal; For                       |
| KM1310                                                | cgtaggtggagaacttgacc                         | <i>sigA</i> internal; Rev                       |
| JY380                                                 | cccgcggcgctaagactctc                         | <i>csm3</i> internal; For                       |
| JY381                                                 | gcgatggcgttgaagtctc                          | <i>csm3</i> internal; Rev                       |
| JY425                                                 | ttggctctcgccgaggcgg                          | <i>cas6</i> internal (P1); For                  |
| JY426                                                 | ttgacctggatttcaccaac                         | <i>cas6</i> internal (P2); For                  |
| JY427                                                 | atgacggaacacttgcgcg                          | <i>cas6</i> internal (P3); For                  |
| JY428                                                 | actgtacgggttcaccggc                          | <i>cas6</i> internal (P4); Rev                  |
| KM1229                                                | ggatcctatgcgcgtcctgtccattc                   | <i>serC</i> -Rv0885 inergenic; For              |
| KM1230                                                | ggatcctgtgcggccatgccatca                     | <i>serC</i> -Rv0885 inergenic; Rev              |
| <b>Promoter construction</b>                          |                                              |                                                 |
| JY392                                                 | tttggatccctgggcccgcctgcttggg                 | Putative <i>cas6</i> promoter (annotated); For  |
| JY393                                                 | tttggatccgcccgcctcggcgagcagccaa              | Putative <i>cas6</i> promoter (annotated); Rev  |
| JY432                                                 | tttggatccattggcggcgccatcctccg                | Putative <i>cas6</i> promoter (identified); For |
| JY433                                                 | tttggatcccgcgacaagtgttccgtcat                | Putative <i>cas6</i> promoter (identified); Rev |
| <b>5' RACE</b>                                        |                                              |                                                 |
| JY532                                                 | ggccacgcgtcgactagtagcgggiigggiigggiig        | Abridged anchor primer                          |
| JY533                                                 | ggccacgcgtcgactagtagc                        | Abridged universal amplification primer         |
| JY534                                                 | cgtagctgtgtcgtatcc                           | <i>cas6</i> gene specific primer                |
| JY535                                                 | ctgcacggagccgaaaacc                          | <i>cas6</i> nest PCR primer                     |
| <b>Deletion of Rv1357c</b>                            |                                              |                                                 |
| JY007                                                 | gatatcccacacgcggccgcatagg                    | Rv1357c upstream homolog; For                   |
| JY008                                                 | aagcttccaagggtgcatcaggattc                   | Rv1357c upstream homolog; Rev                   |
| JY009                                                 | tctagagtgcgtgggtgtagatcg                     | Rv1357c downstream homolog; For                 |
| JY010                                                 | ggtaccccccaccggacttcacttcc                   | Rv1357c downstream homolog; Rev                 |
| JY011                                                 | cacgcactctcgttgatcg                          | Verify Rv1357c upstream crossover               |
| JY002                                                 | tcgacgacctgcaggcatgc                         | Verify Rv1357c upstream crossover; Rev          |
| JY003                                                 | actggcgcagttcctctggg                         | Verify Rv1357c downstream crossover; For        |
| JY012                                                 | gggacatgcttagcggtagg                         | Verify Rv1357c downstream crossover; Rev        |
| JY013                                                 | cgtctaccagccaatcatcc                         | Rv1357c internal; For                           |
| JY014                                                 | gacgttgacgctgacaaaacg                        | Rv1357c internal; Rev                           |
| <b>Northern blot probe</b>                            |                                              |                                                 |
| JY524                                                 | gtttccgtcccctctcggggttttgggtctga             | CRISPR repeats specific oligo                   |
| JY525                                                 | cgacaccaggatcacaacctggtgctctacc              | His-tRNA probe                                  |
| KM887                                                 | tgaagagggtttacaacccc                         | 16S rRNA probe                                  |
| <b>Expression of <i>orn</i> in mycobacteria</b>       |                                              |                                                 |
| JY388                                                 | tttggtagcagtgccaatgaaaacaacctg               | <i>orn</i> ORF; For                             |
| JY389                                                 | tttggtagcagaccaggaaaaattttacag               | <i>orn</i> ORF; Rev                             |
| <b>Overexpression of <i>orn</i> in <i>E. coli</i></b> |                                              |                                                 |
| JY518                                                 | tttcatatgatgagtgccaatgaaaacaac               | <i>orn</i> ORF; For                             |
| JY519                                                 | tttagcttcgtgaccaggaaaaatttta                 | <i>orn</i> ORF; Rev                             |

<sup>a</sup> The restriction site is underlined if presents in an oligo.

<sup>b</sup> For, forward primer; Rev, reverse primer.

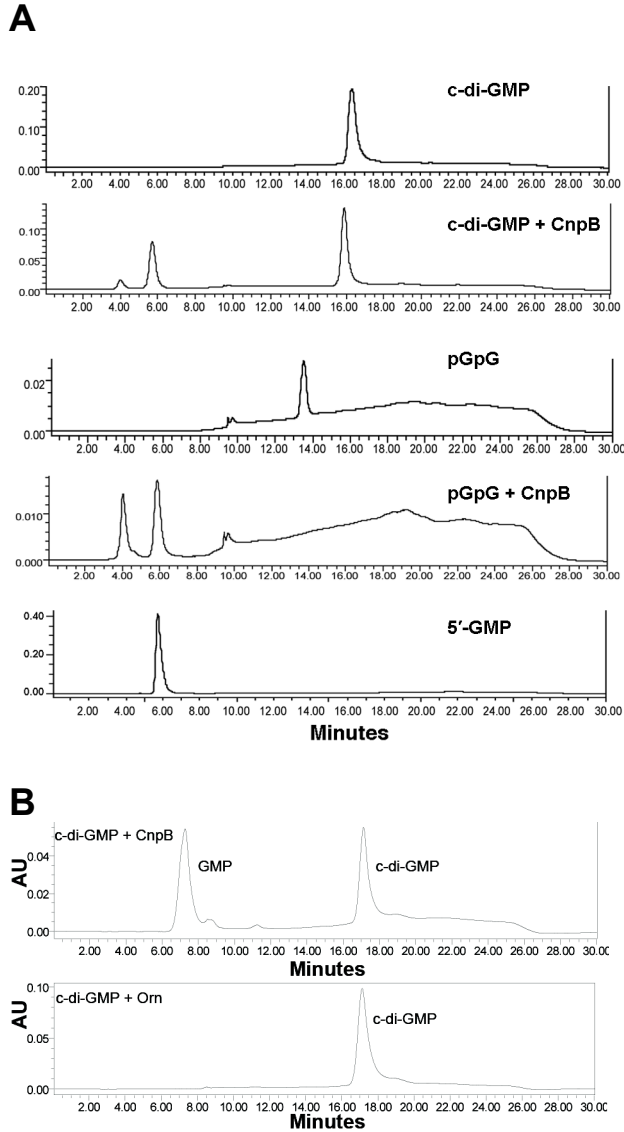

**Fig. S1. Cleavage of c-di-AMP, c-di-GMP, pApA and pGpG by the same concentration of CnpB determined using HPLC.** Purified c-di-AMP, c-di-GMP, pApA, pGpG, 5'-AMP, and 5'-GMP were used as standards. The result showed that CnpB also cleaves c-di-GMP and pGpG, which is much weakly compared to the cleavage of c-di-AMP (**A**). However, Orn did not hydrolyze c-di-GMP, similarly to c-di-AMP (**B**).

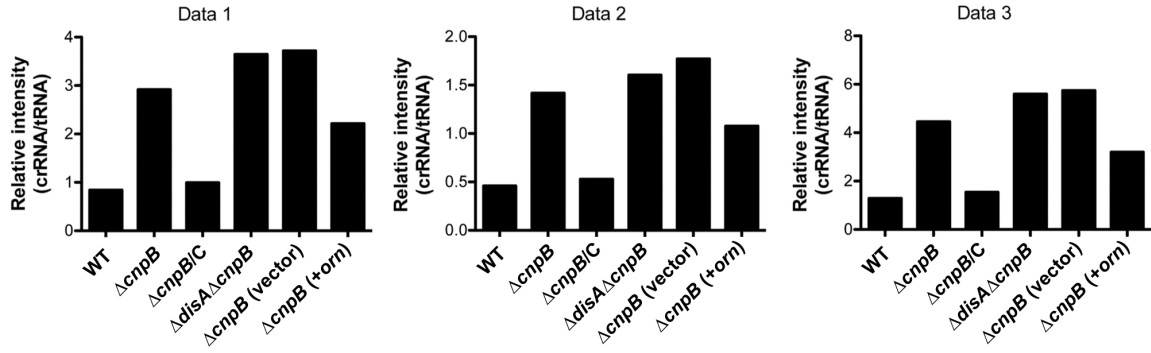

**Fig. S2. Quantitation of Northern blot results as represented in Fig. 7.** The intensity of the same area of crRNA bands in each sample was determined using ImageJ. Meanwhile, the intensity of the same area of the related tRNA band was examined. The relative intensity was calculated by normalizing the intensity of the crRNA bands with that of the related tRNA band.
